# Supplementary material for: Sb- and Bi-doped Mg2Si: location of the dopants, micro- and nanostructures, electronic structures and thermoelectric properties
Source: Royal Society of Chemistry journal article supplement (doi:10.1039/c4dt01177e), 2014-06-09
Supplement: c4dt01177e1.pdf [file c4dt01177e1.pdf]

Special issue: Inorganic Chemistry for Renewable Energy Conversion and Storage.

**Sb- and Bi-doped Mg<sub>2</sub>Si: location of the dopants, micro- and nanostructures, electronic structures and thermoelectric properties**

Nader Farahi,<sup>a</sup> Mathew VanZant,<sup>a</sup> Jianbao Zhao,<sup>b</sup> John S. Tse,<sup>b</sup> Sagar Prabhudev,<sup>c</sup> Gianluigi A. Botton,<sup>c</sup> James R. Salvador,<sup>d</sup> Ferenc Borondics,<sup>e</sup> Zhenxian Liu,<sup>f</sup> Holger Kleinke<sup>a,\*</sup>

Supplementary information

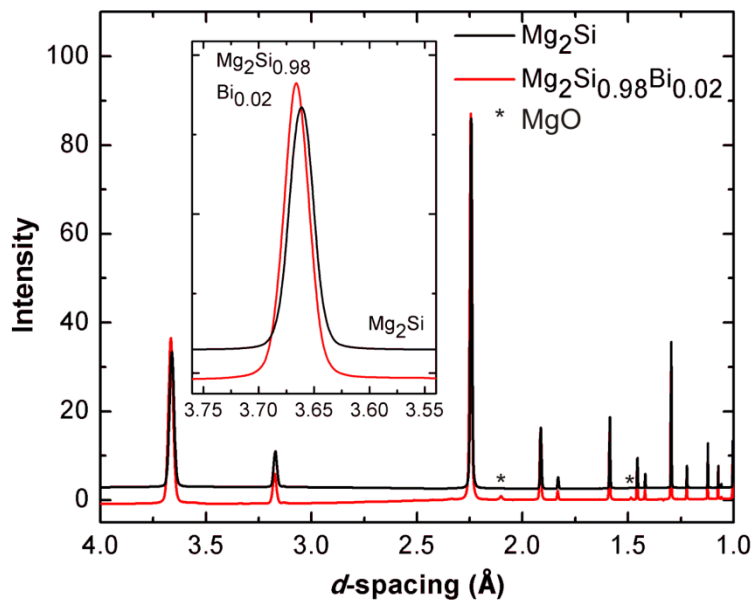

Figure S1. Experimental powder diagrams of Mg<sub>2</sub>Si and Mg<sub>2</sub>Si<sub>0.98</sub>Bi<sub>0.02</sub>.

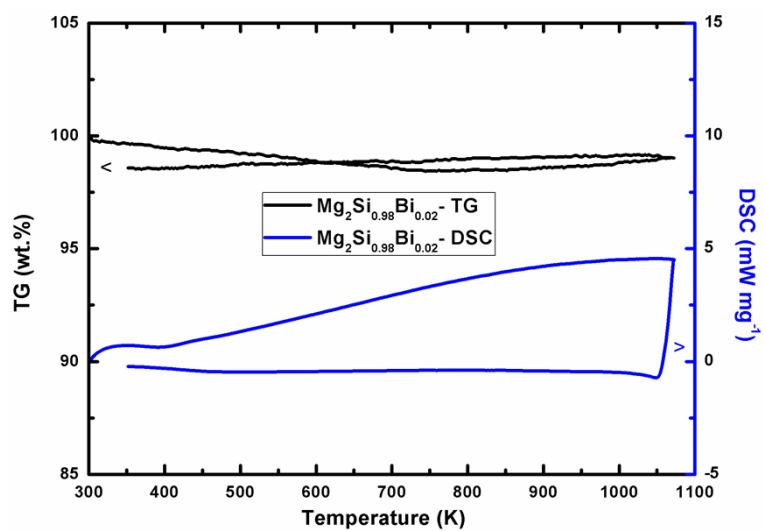

Figure S2. TG and DSC of  $\text{Mg}_2\text{Si}_{0.98}\text{Bi}_{0.02}$ .

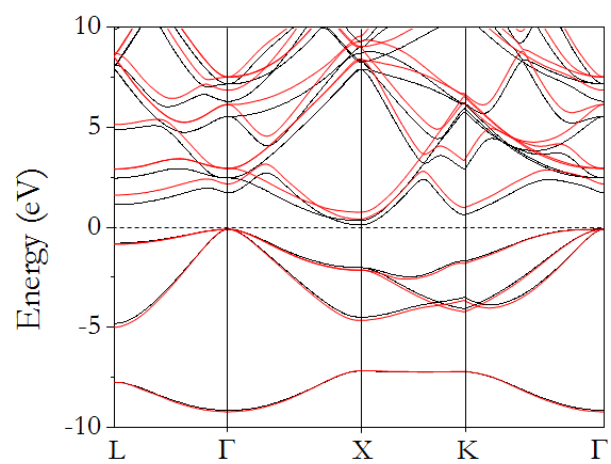

Figure S3. Band structure of  $\text{Mg}_2\text{Si}$ . Black: GGA, red: GW method.
